# Supplementary material
Source: ML conference proceedings conference paper supplement (https://openreview.net/forum?id=4t3ox9hj3z)

### Empirical Measure of $x$

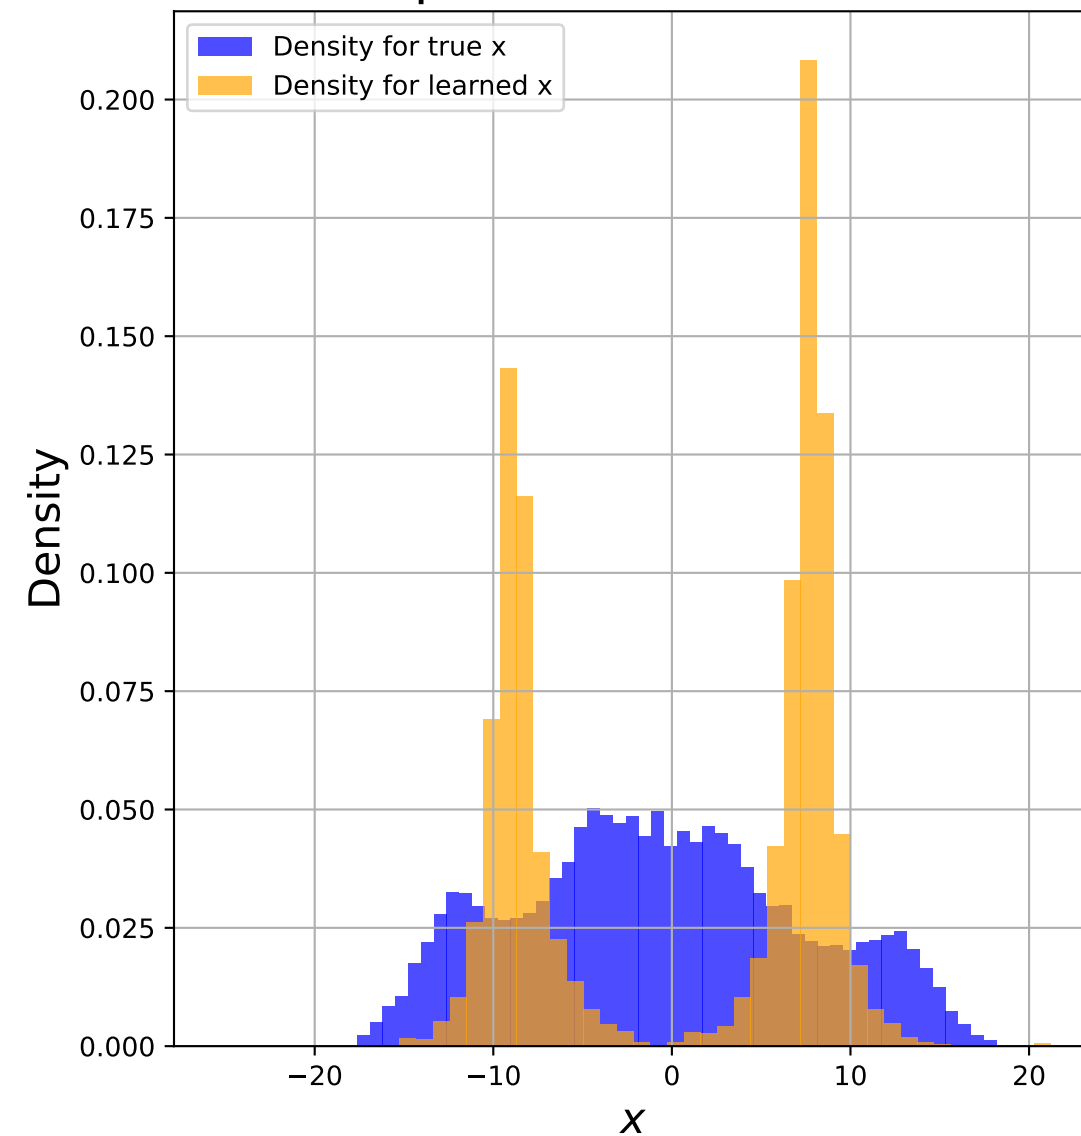

### Empirical Measure of $y$

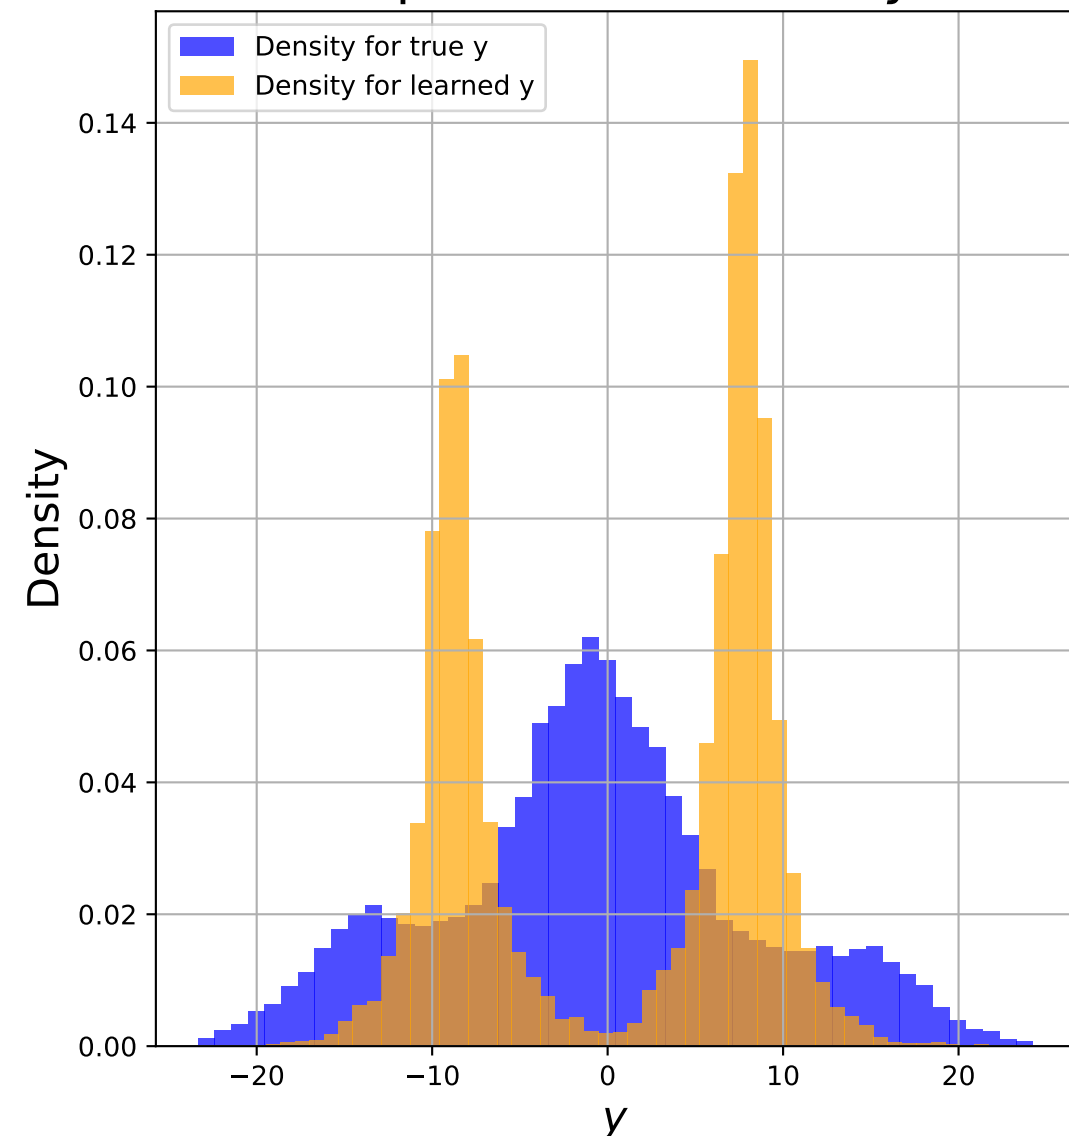

### Empirical Measure of $z$

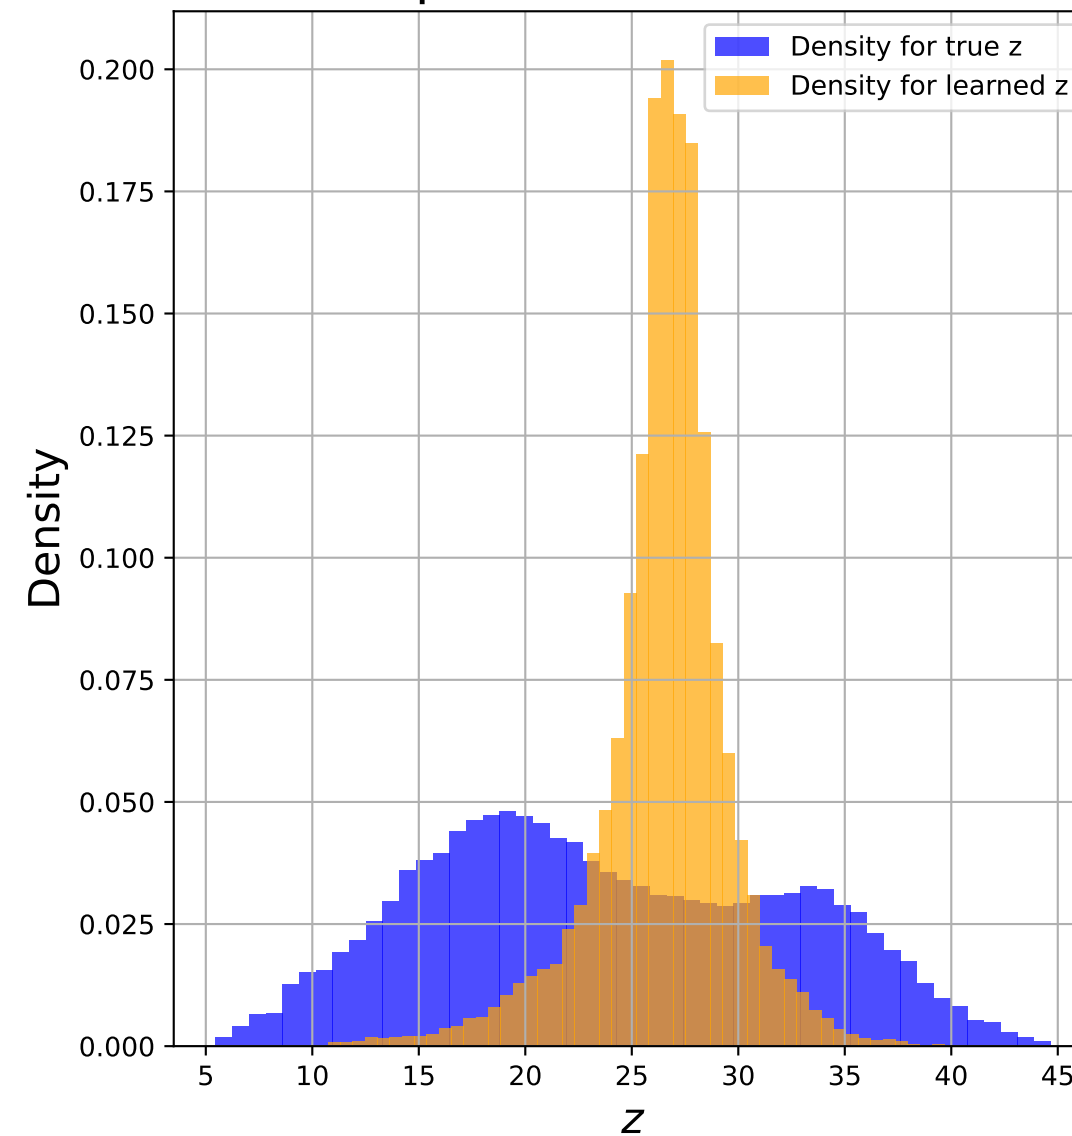

Supplement: supplementary_material [file attachment]

Samples

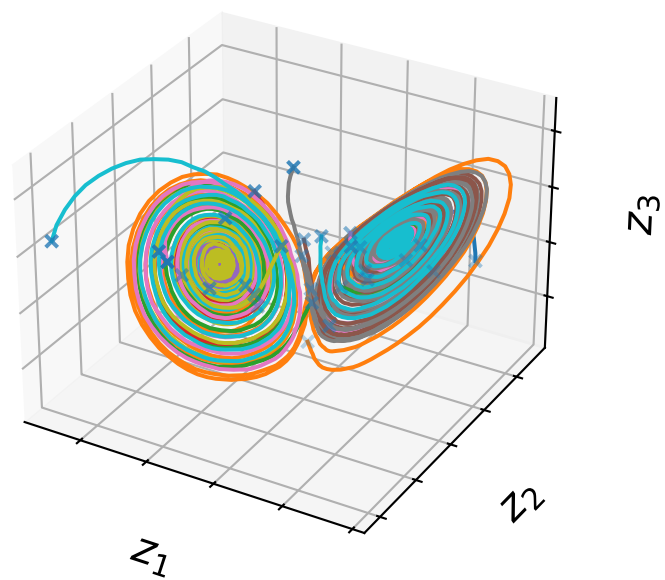

Data

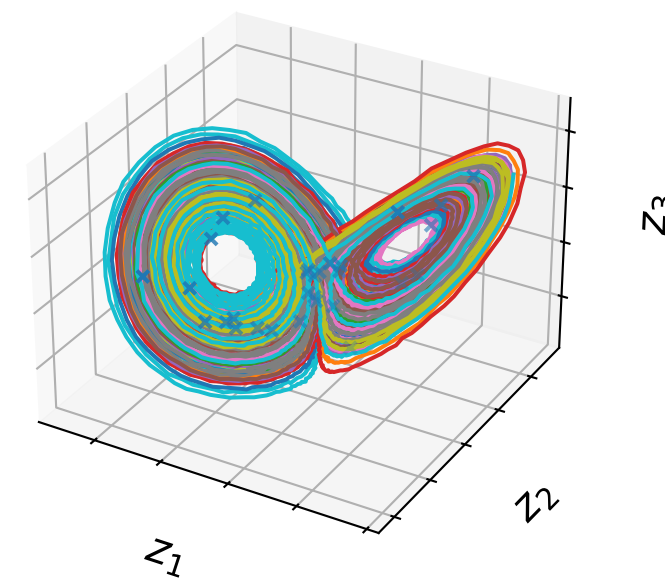

Empirical Measure

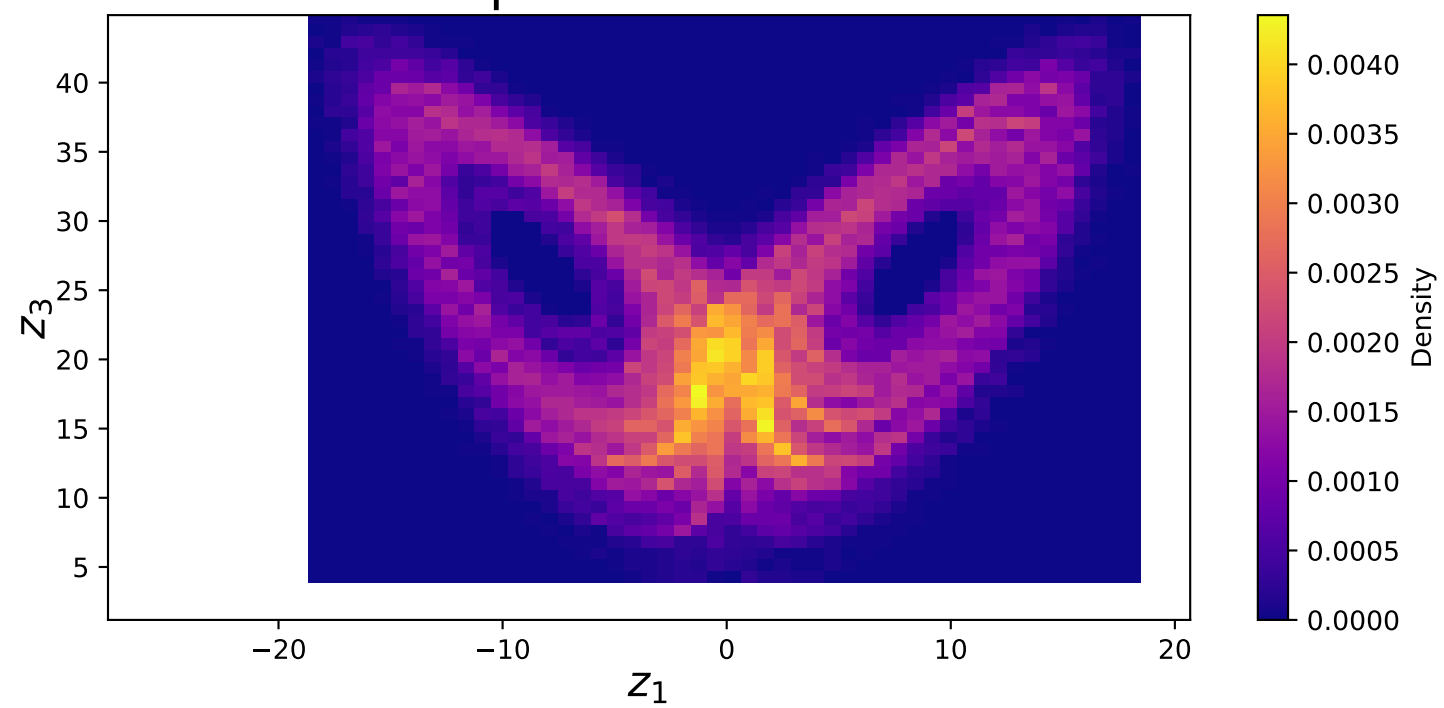

Empirical Measure

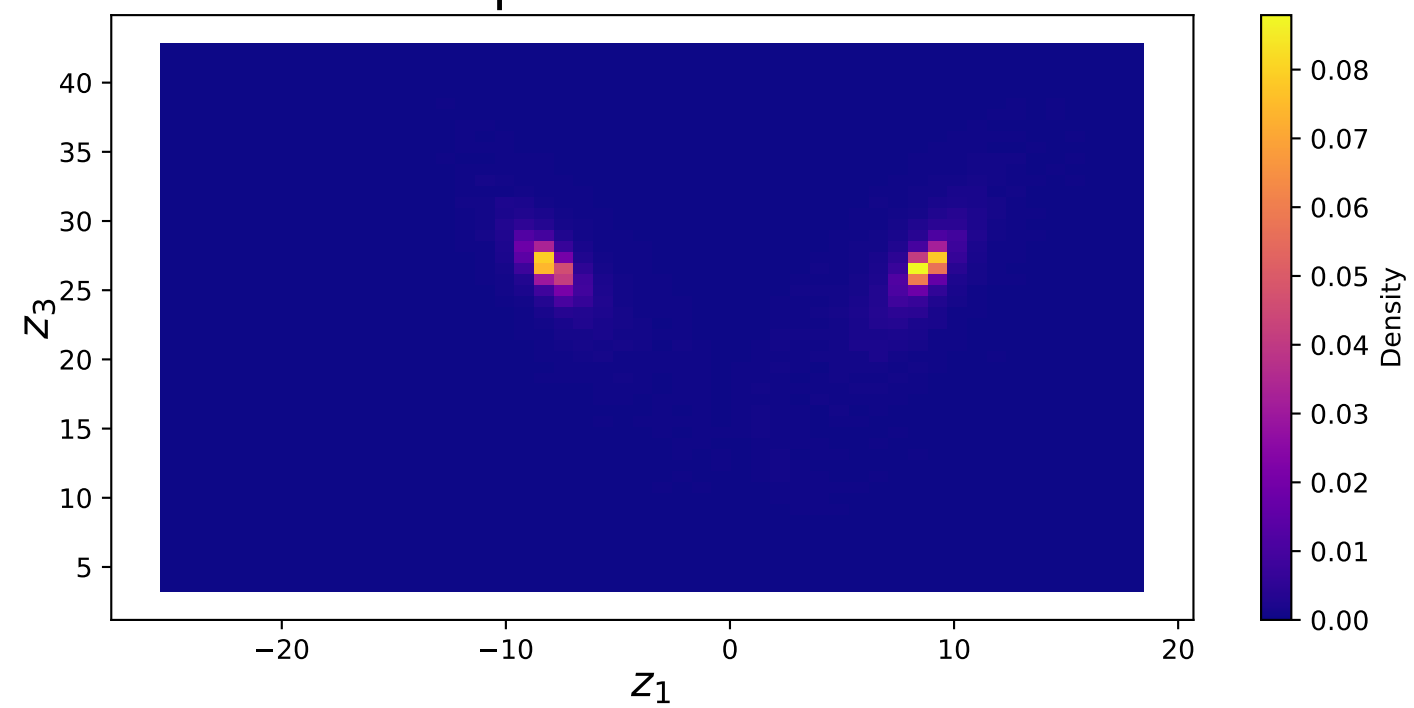

Supplement: supplementary_material [file attachment]

### Samples

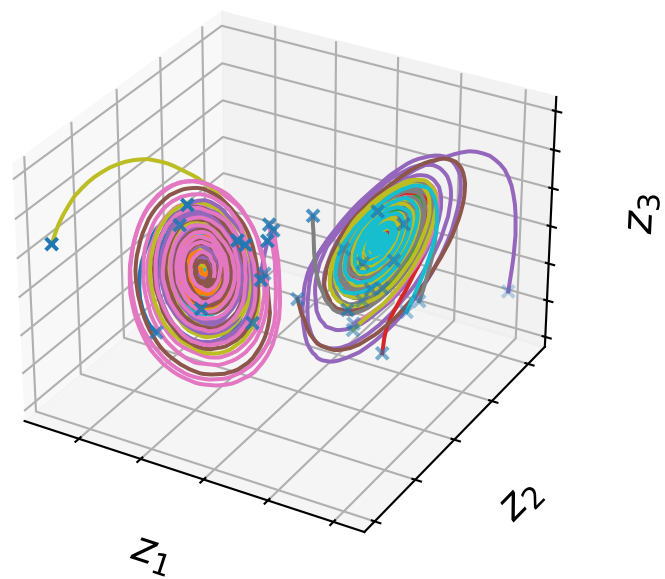

### Data

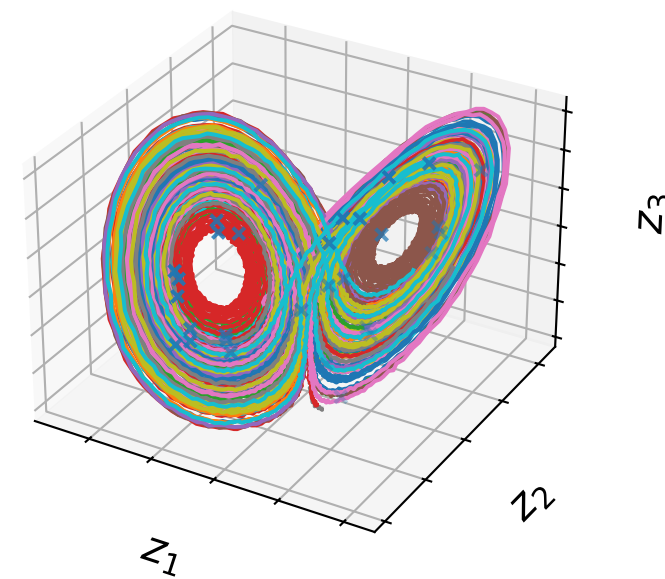

### Empirical Measure

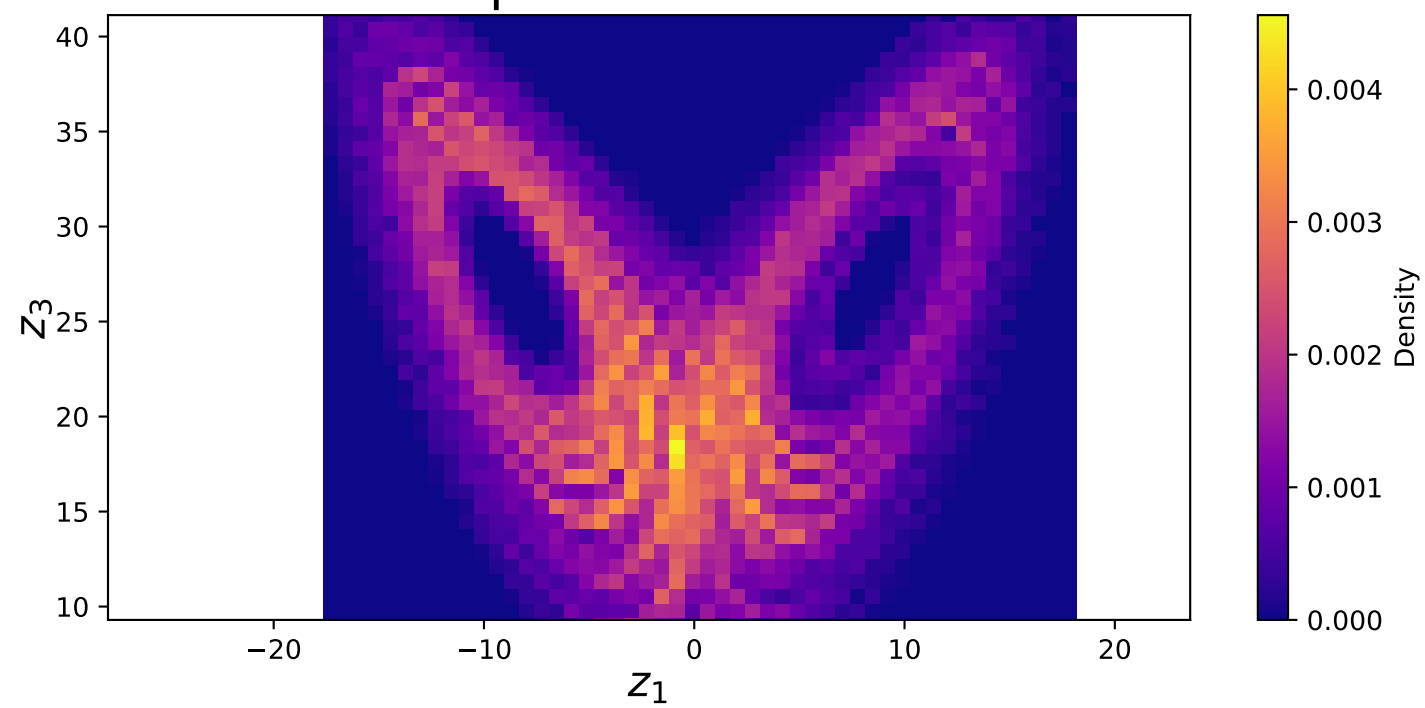

### Empirical Measure

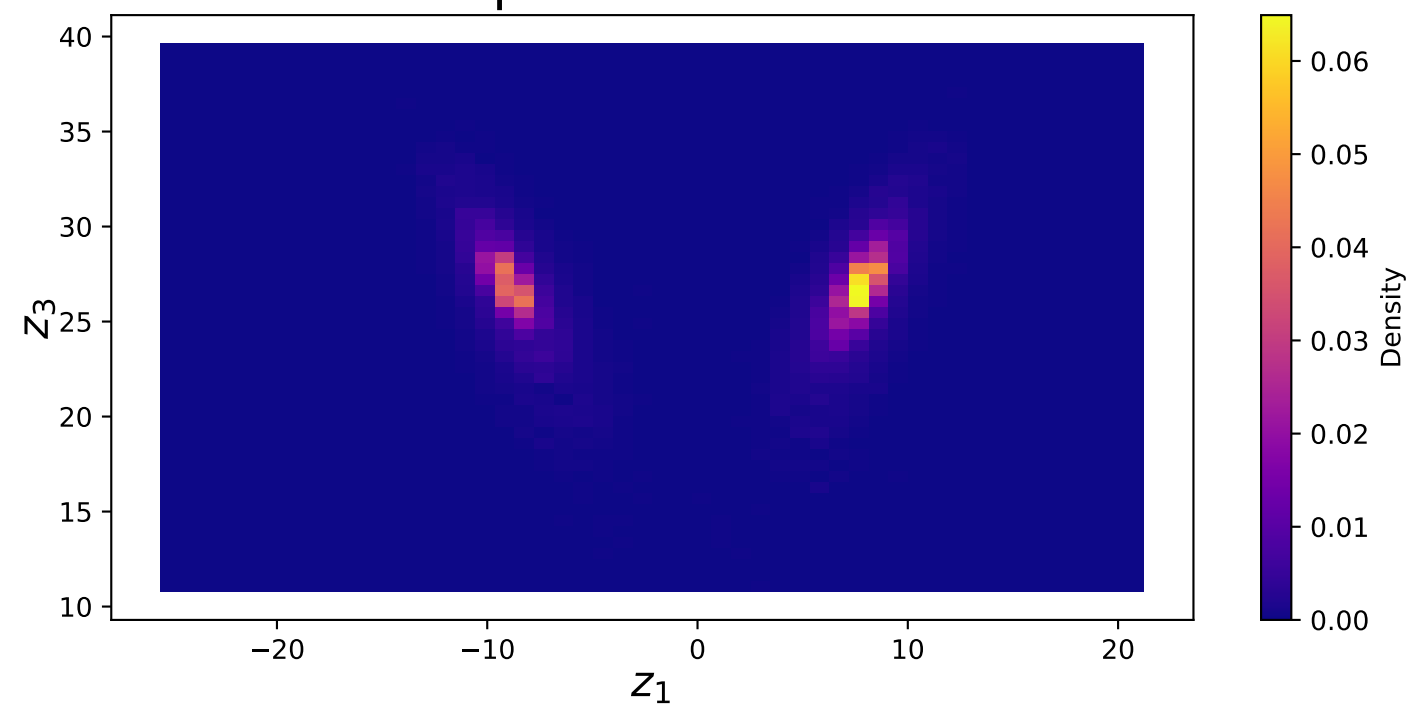

Supplement: supplementary_material [file attachment]

### Empirical Measure of $x$

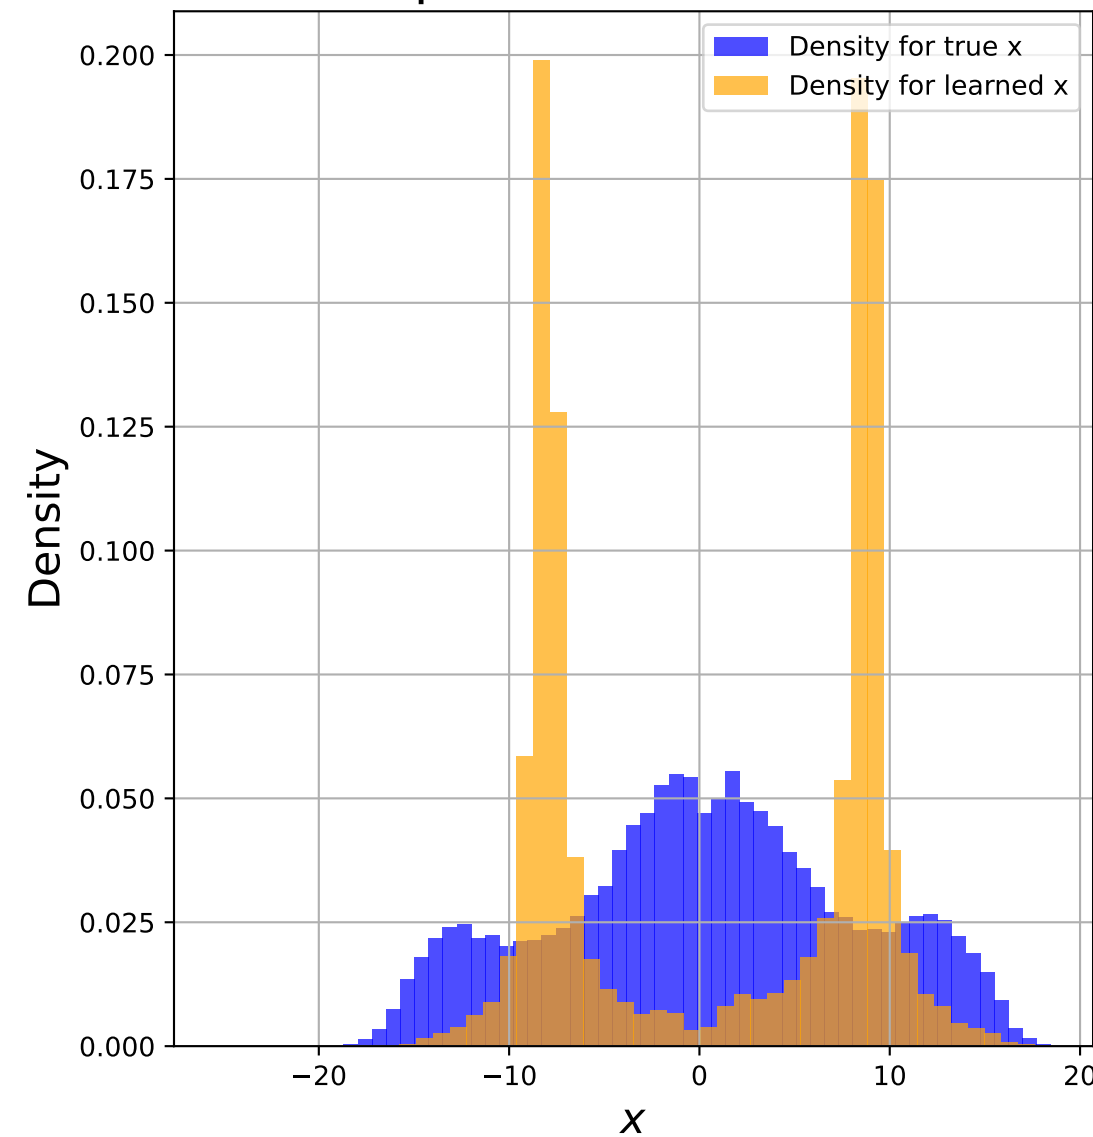

### Empirical Measure of $y$

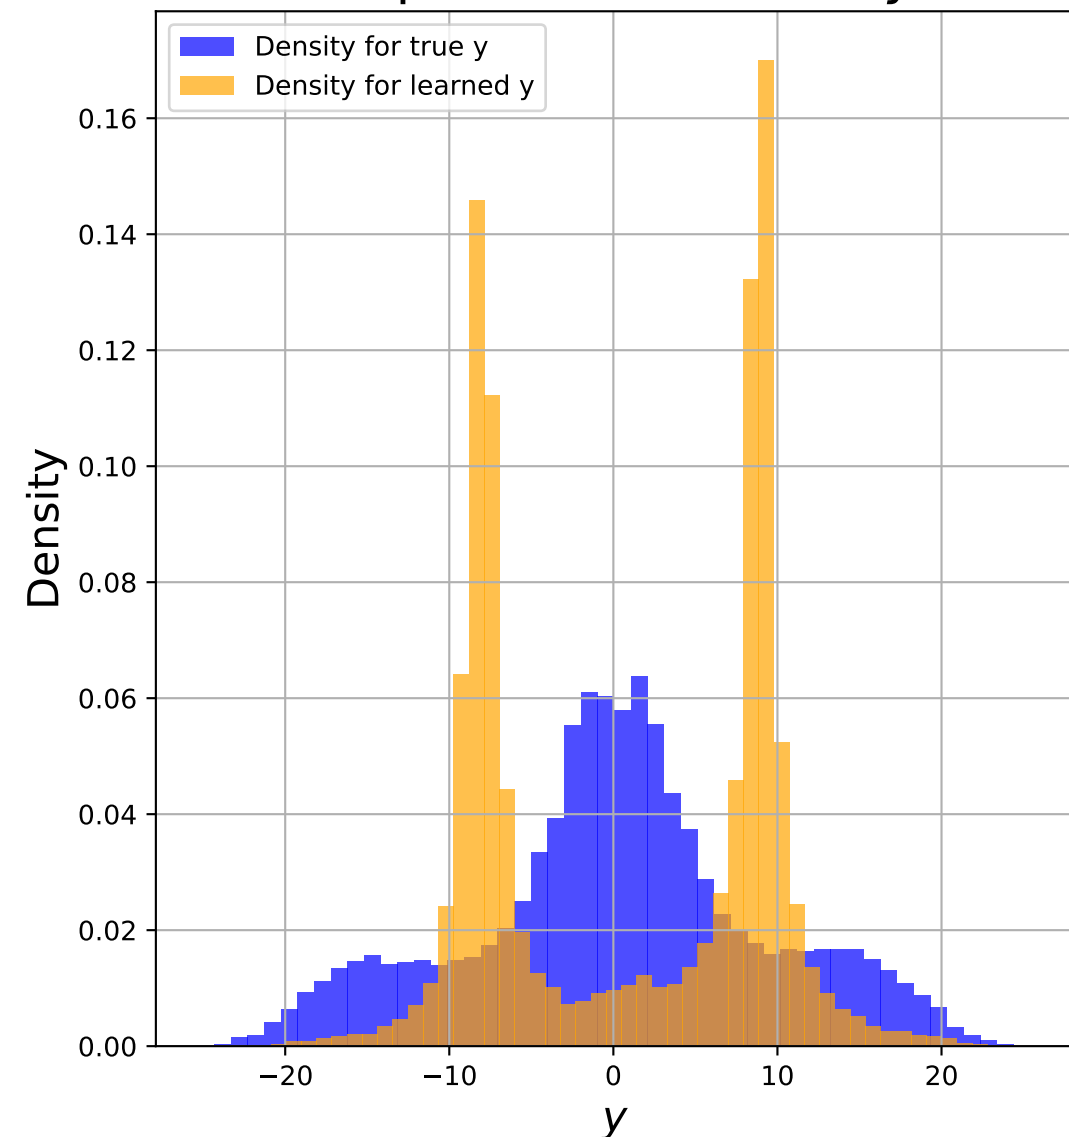

### Empirical Measure of $z$

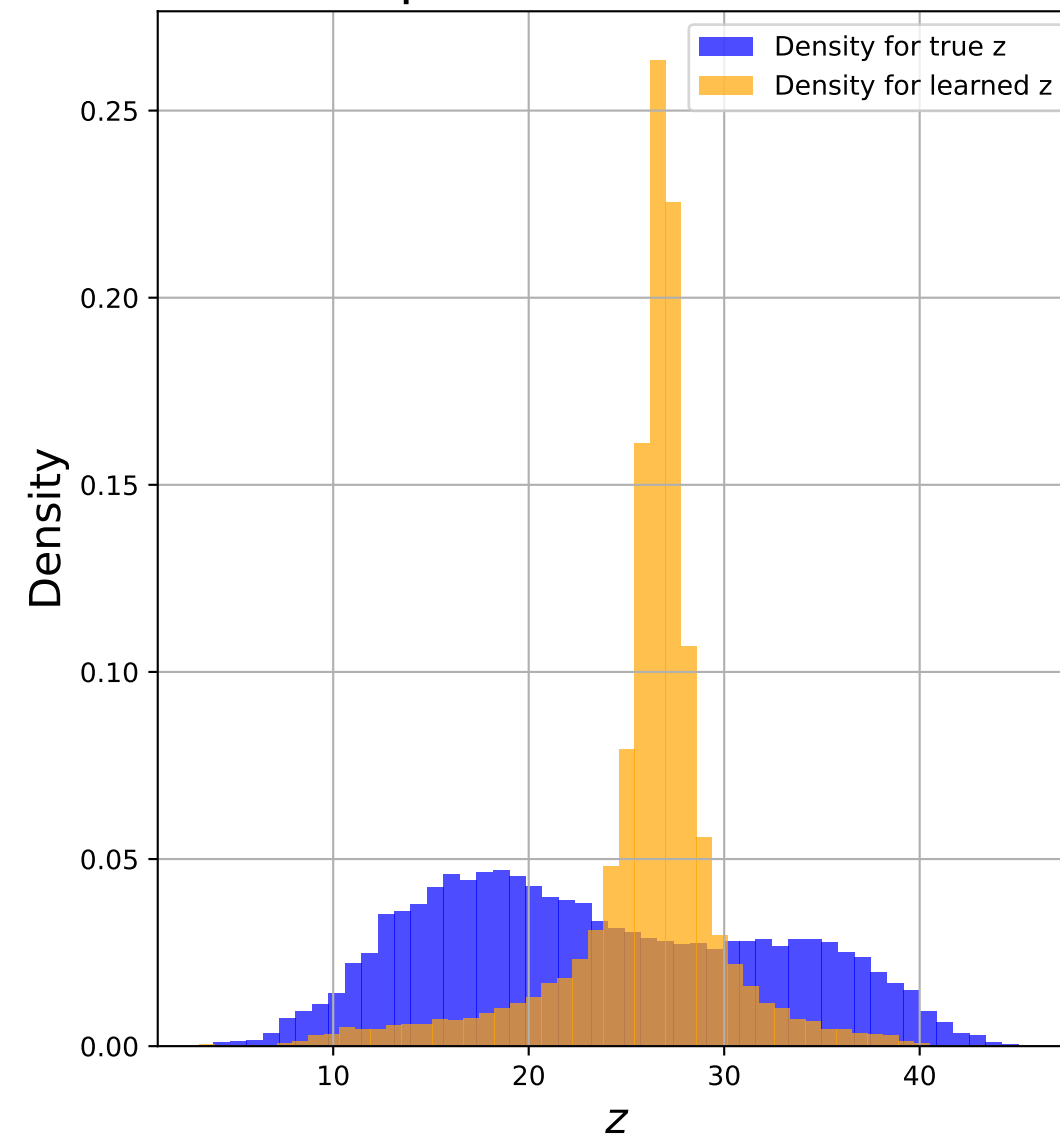

Supplement: supplementary_material [file attachment]
